# Supplementary material
Source: publisher site journal article supplement (https://www.dovepress.com/article/272829)

- 1 Supplementary Figure 1. Photos of forearm taken at  $t_3$  showed that there was an apparent discrepancy
- 2 between C6 and C8 innervation areas. The blocked side was in the upper of photo. A, forearms imaged by
- 3 LSCI. B, forearms imaged by IT.

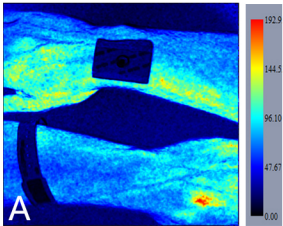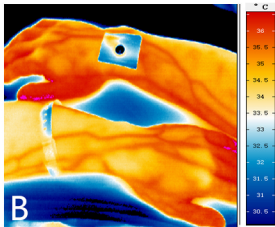

Supplement: Supplementary file 1 [file get_supplementary_file.php]
